15. Richards S, Aziz N, Bale S, Bick D, Das S, Gastier-Foster J *et al.*; on behalf of the ACMG Laboratory Quality Assurance Committee. Standards and guidelines for the interpretation of sequence variants: a joint consensus recommendation of the American College of Medical Genetics and Genomics and the Association for Molecular Pathology. *Genet Med* 2015;**17**:405–24.
16. Zipes DP, Camm AJ, Borggrefe M, Buxton AE, Chaitman B, Fromer M *et al.* ACC/AHA/ESC 2006 Guidelines for management of patients with ventricular arrhythmias and the prevention of sudden cardiac death: a report of the American College of Cardiology/American Heart Association Task Force and the European Society of Cardiology Committee for Practice Guidelines. *Europace* 2006;**8**:746–837.
17. Krahn AD, Healey JS, Chauhan V, Birnie DH, Simpson CS, Champagne J *et al.* Systematic assessment of patients with unexplained cardiac arrest: cardiac arrest survivors with preserved ejection fraction registry (CASPER). *Circulation* 2009;**120**:278–85.
18. Fernández-Falgueras A, Sarquella-Brugada G, Brugada J, Brugada R, Campuzano O. Cardiac channelopathies and sudden death: recent clinical and genetic advances. *Biology (Basel)* 2017;**6**: 1–21.
19. Wijeyeratne YD, Behr ER. Sudden death and cardiac arrest without phenotype: the utility of genetic testing. *Trends Cardiovasc Med* 2017;**27**:207–13.
20. Papadakis M, Raju H, Behr ER, De Noronha SV, Spath N, Kouloubinis A *et al.* Sudden cardiac death with autopsy findings of uncertain significance—potential for erroneous interpretation. *Circ Arrhythm Electrophysiol* 2013;**6**:588–96.

## IMAGES IN ELECTROPHYSIOLOGY

doi:10.1093/europace/euaa098  
Online publish-ahead-of-print 1 May 2020

# Inappropriate subcutaneous implantable cardioverter-defibrillator shock due to electromagnetic interference

Utkarsh Kohli <sup>1\*</sup> and Sohail Hassan<sup>2</sup>

<sup>1</sup>Division of Pediatric Cardiology, Section of Pediatrics, Comer Children's Hospital and the University of Chicago Pritzker School of Medicine, 5841 S Maryland Ave., RM C104-E, MC 4051, Chicago, IL 60637, USA; and <sup>2</sup>Division of Electrophysiology, Department of Cardiology, St. John Hospital and Medical Center, Detroit, MI, USA

\* Corresponding author. Tel: 773-702-6172; fax: 773-702-2319. E-mail address: ukohli@peds.bsd.uchicago.edu

A 34-year-old male with prolonged QTc (Panel A, QTc: 560 ms, likely long QT syndrome subtype 2) felt a shock while using a drill [ $>12$  inches (30 cm) away from S-implantable cardioverter-defibrillator]. Device interrogation revealed low amplitude QRS complexes marching through the noise which coincided with the use of drill suggesting electromagnetic interference (EMI) (Panel B).

Low amplitude of QRS complexes may have contributed to the inability to filter out the external noise. Smart pass filter (9 Hz high-pass filter, enabled) reduces amplitude of low frequency signals (T waves) but is not useful for high frequency signals like EMI. The EMI (notch) filter (non-programmable) of the device was set at 60 Hz. The band pass filter (3–40 Hz, wide-range filter, non-programmable) was also enabled. The patient has not used the drill since then and is doing well.

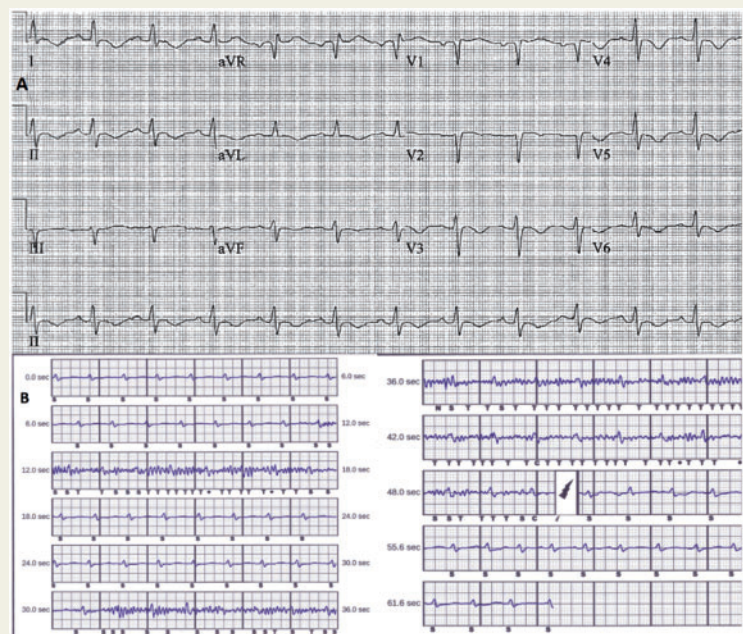

Source: https://academic.oup.com/europace/article-pdf/22/6/971/33341803/euaa098.pdf
